# Supplementary material for: Exosomes from Placenta-Derived Mesenchymal Stem Cells Are Involved in Liver Regeneration in Hepatic Failure Induced by Bile Duct Ligation
Source: Hindawi journal article supplement (doi:10.1155/2020/5485738), 2020-10-09
Supplement: f1 [file 5485738.f1.pdf]

484 **Supplementary Materials**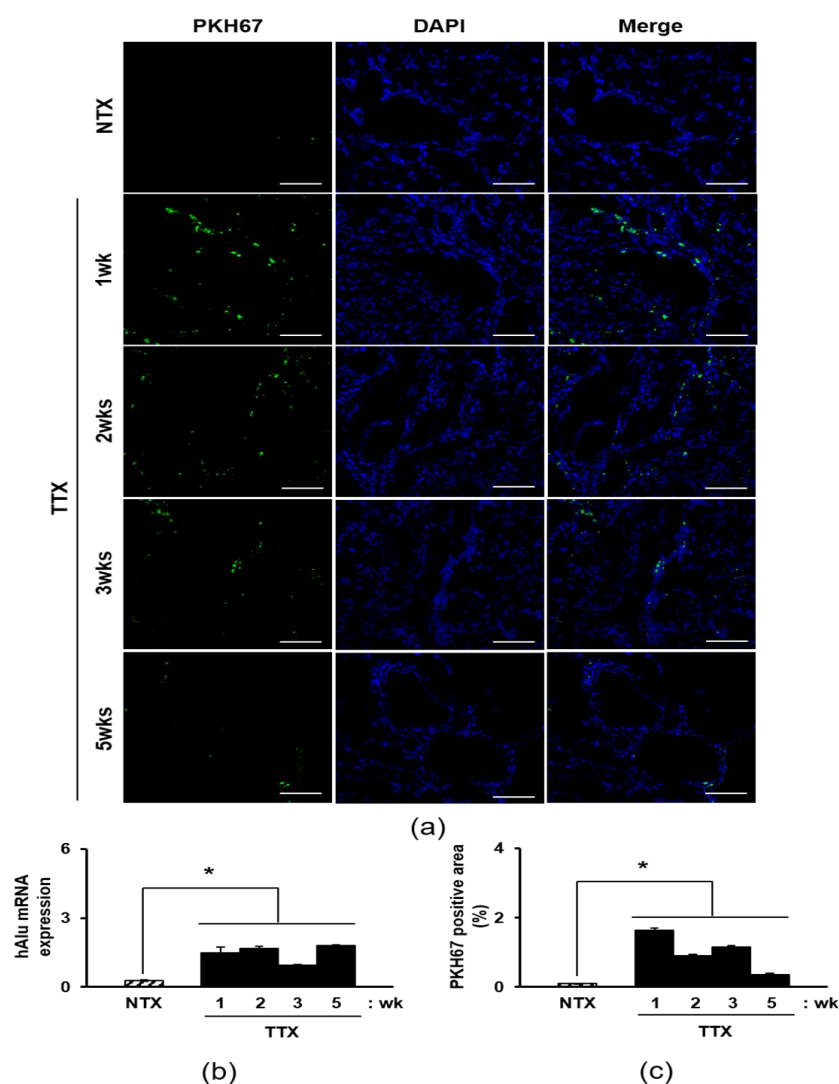

**SUPPLEMENTARY FIGURE 1: Engraftment and tracing of PKH67 fluorescence labeled human PD-MSC in BDL-injured rat livers.** The engrafted PD-MSCs into the rat liver were detected and traced by labeling the PKH67 (green) using fluorescence microscope (a) and (c). n=5 per group, Scale bars: 20μm. The expression of human-specific Alu sequence in BDL-injured rat livers after PD-MSCs transplantation using quantitative real-time PCR analysis (b). n=3 per group. \*, NTX group vs; p<0.05. Data were represented as the mean ± SD.

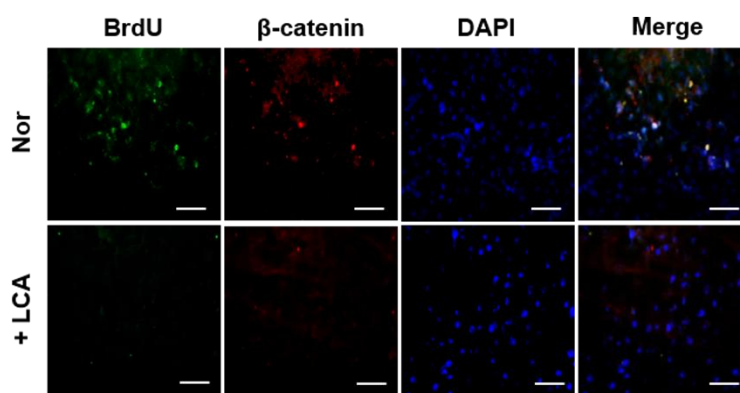

SUPPLEMENTARY FIGURE 2: The representative images of immunofluorescence were stained with WB-F344s for  $\beta$ -catenin and BrdU in normal and LCA treated group. LCA, lithocholic acid-treated group. Scale bars: 50 $\mu$ m.
